# Supplementary material for: Mediterranean diet score and total and cardiovascular mortality in Eastern Europe: the HAPIEE study
Source: Springer Nature journal article supplement (doi:10.1007/s00394-015-1092-x), 2015-11-17
Supplement: MOESM1 [file 8392540]

## **SUPPLEMENTARY TABLES**

Article Title: Mediterranean diet score and total and cardiovascular mortality in Eastern Europe: the HAPIEE study

Journal name: European Journal of Nutrition

Authors: Denes Stefler, Sofia Malyutina, Ruzena Kubinova, Andrzej Pajak, Anne Peasey, Hynek Pikhart, Eric J Brunner, Martin Bobak

Corresponding author: Denes Stefler; Department of Epidemiology and Public Health, University College London; [denes.stefler.10@ucl.ac.uk](mailto:denes.stefler.10@ucl.ac.uk)

**Table S1 (Supplementary material).** Results of Cox-regression analysis between MDS and mortality outcomes by country cohort

| Cause of death | Cohort  | Death/n  | MDS categories <sup>a</sup> |                         |                         | PP (%) <sup>b</sup> | Per 1 SD <sup>c</sup> increase in MDS score |         |
|----------------|---------|----------|-----------------------------|-------------------------|-------------------------|---------------------|---------------------------------------------|---------|
|                |         |          | Low                         | Moderate                | High                    |                     | HR                                          | (95%CI) |
|                |         |          | HR                          | HR (95% CI)             | HR (95% CI)             |                     |                                             |         |
| Any-cause      | Czech   | 364/5967 | <b>1.0</b>                  | <b>0.72</b> (0.56-0.93) | <b>0.82</b> (0.62-1.09) | <b>7.1</b>          | <b>0.94</b> (0.85-1.05)                     | 0.277   |
|                | Polish  | 388/6543 | <b>1.0</b>                  | <b>0.83</b> (0.64-1.06) | <b>0.78</b> (0.59-1.05) | <b>8.4</b>          | <b>0.90</b> (0.81-0.99)                     | 0.038   |
|                | Russian | 562/6823 | <b>1.0</b>                  | <b>0.94</b> (0.79-1.12) | <b>0.98</b> (0.75-1.29) | <b>0.7</b>          | <b>0.97</b> (0.88-1.05)                     | 0.459   |
| CVD            | Czech   | 106/5965 | <b>1.0</b>                  | <b>0.80</b> (0.51-1.27) | <b>0.87</b> (0.51-1.49) | <b>4.9</b>          | <b>0.92</b> (0.76-1.12)                     | 0.424   |
|                | Polish  | 99/6517  | <b>1.0</b>                  | <b>1.27</b> (0.76-2.12) | <b>0.92</b> (0.50-1.71) | <b>2.5</b>          | <b>0.93</b> (0.76-1.13)                     | 0.458   |
|                | Russian | 233/6781 | <b>1.0</b>                  | <b>0.92</b> (0.70-1.21) | <b>0.73</b> (0.45-1.17) | <b>10.2</b>         | <b>0.90</b> (0.79-1.03)                     | 0.117   |
| CHD            | Czech   | 43/5965  | <b>1.0</b>                  | <b>1.28</b> (0.60-2.73) | <b>1.10</b> (0.44-2.72) | <b>-3.0</b>         | <b>1.03</b> (0.75-1.42)                     | 0.841   |
|                | Polish  | 45/6517  | <b>1.0</b>                  | <b>1.28</b> (0.61-2.70) | <b>0.94</b> (0.38-2.30) | <b>1.9</b>          | <b>0.90</b> (0.67-1.21)                     | 0.481   |
|                | Russian | 138/6781 | <b>1.0</b>                  | <b>0.86</b> (0.70-1.21) | <b>0.77</b> (0.42-1.40) | <b>8.7</b>          | <b>0.87</b> (0.73-1.04)                     | 0.120   |
| Stroke         | Czech   | 18/5965  | <b>1.0</b>                  | <b>0.78</b> (0.25-2.46) | <b>0.91</b> (0.25-3.32) | <b>3.3</b>          | <b>0.83</b> (0.51-1.35)                     | 0.450   |
|                | Polish  | 20/6517  | <b>1.0</b>                  | <b>0.65</b> (0.23-1.82) | <b>0.45</b> (0.12-1.65) | <b>26.2</b>         | <b>0.82</b> (0.52-1.28)                     | 0.378   |
|                | Russian | 71/6781  | <b>1.0</b>                  | <b>0.94</b> (0.57-1.54) | <b>0.77</b> (0.33-1.77) | <b>8.5</b>          | <b>0.92</b> (0.72-1.17)                     | 0.490   |

All HRs are adjusted for age, sex, education, marital status, household amenities score, smoking, physical activity, total energy intake, vitamin supplement intake

<sup>a</sup> As in Table 2

<sup>b</sup> Preventable proportion of death if participants in the lowest two categories increased their adherence to Mediterranean diet one category upward

<sup>c</sup> 1SD=2.3 MDS points in the Czech, 2.2 MDS points in the Polish and 2.0 points in the Russian cohort

**Table S2 (Supplementary material).** Results of Cox-regression analysis between the “original” MDS<sup>a</sup> and mortality outcomes on the pooled sample

| Cause of death | dead/n      | model  | MDS categories |                         |                         | Per 1 SD <sup>b</sup> increase in MDS score |         |         |
|----------------|-------------|--------|----------------|-------------------------|-------------------------|---------------------------------------------|---------|---------|
|                |             |        | Low (0-3p)     | Moderate (4-5p)         | High (6-9p)             | HR                                          | (95%CI) | p-value |
|                |             |        | HR             | HR (95% CI)             | HR (95% CI)             | HR                                          | (95%CI) |         |
| Any-cause      | 1314/19,333 | model1 | <b>1.0</b>     | <b>0.83</b> (0.73-0.94) | <b>0.77</b> (0.66-0.90) | <b>0.91</b> (0.86-0.96)                     | 0.001   |         |
|                |             | model2 | <b>1.0</b>     | <b>0.90</b> (0.79-1.02) | <b>0.88</b> (0.76-1.03) | <b>0.95</b> (0.90-1.01)                     | 0.108   |         |
| CVD            | 438/19,263  | model1 | <b>1.0</b>     | <b>0.79</b> (0.64-0.98) | <b>0.69</b> (0.53-0.90) | <b>0.86</b> (0.79-0.95)                     | 0.002   |         |
|                |             | model2 | <b>1.0</b>     | <b>0.86</b> (0.69-1.07) | <b>0.81</b> (0.62-1.06) | <b>0.92</b> (0.83-1.01)                     | 0.079   |         |
| CHD            | 226/19,263  | model1 | <b>1.0</b>     | <b>0.76</b> (0.56-1.02) | <b>0.64</b> (0.44-0.92) | <b>0.82</b> (0.72-0.94)                     | 0.004   |         |
|                |             | model2 | <b>1.0</b>     | <b>0.84</b> (0.62-1.14) | <b>0.77</b> (0.53-1.11) | <b>0.88</b> (0.77-1.01)                     | 0.065   |         |
| Stroke         | 109/19,263  | model1 | <b>1.0</b>     | <b>0.73</b> (0.47-1.11) | <b>0.68</b> (0.47-1.11) | <b>0.90</b> (0.74-1.09)                     | 0.269   |         |
|                |             | model2 | <b>1.0</b>     | <b>0.74</b> (0.48-1.13) | <b>0.71</b> (0.42-1.22) | <b>0.91</b> (0.75-1.11)                     | 0.369   |         |

**model 1:** adjusted for sex, age, cohort

**model 2:** adjusted for sex, age, cohort, smoking, education, household amenities score, marital status, energy intake, physical activity, vitamin supplement Intake

<sup>a</sup> Trichopoulou A, Orfanos P, Norat T et al (2005) Modified Mediterranean diet and survival: EPIC-elderly prospective cohort study. BMJ 330:991

<sup>b</sup> 1SD=1.5 points
